# Supplementary material
Source: publisher figshare collection journal article supplement (https://frontiersin.figshare.com/ndownloader/files/22383678)
Supplement: Supplementary file [file 22383678]

**TABLE S1** Zone diameter breakpoints used for antimicrobial susceptibility testing in this study

| Antimicrobial class                    | Agent                         | Disk content (µg) | Zone diameter breakpoints (mm) <sup>a</sup> |       |      | Reference |
|----------------------------------------|-------------------------------|-------------------|---------------------------------------------|-------|------|-----------|
|                                        |                               |                   | R                                           | I     | S    |           |
| Aminoglycoside                         | Gentamicin                    | 10                | ≤ 12                                        | 13-14 | ≥ 15 | [1]       |
|                                        | Amikacin                      | 30                | ≤ 14                                        | 15-16 | ≥ 17 | [1]       |
| Carbapenem                             | Ertapenem                     | 10                | ≤ 18                                        | 19-21 | ≥ 22 | [1]       |
|                                        | Imipenem                      | 10                | ≤ 19                                        | 20-22 | ≥ 23 | [1]       |
|                                        | Meropenem                     | 10                | ≤ 19                                        | 20-22 | ≥ 23 | [1]       |
|                                        | Cefazolin                     | 30                | ≤ 19                                        | 20-22 | ≥ 23 | [1]       |
| Non-extended spectrum cephalosporin    | Cefotaxime                    | 30                | ≤ 22                                        | 23-25 | ≥ 26 | [1]       |
| Extended spectrum cephalosporin        | Ceftazidime                   | 30                | ≤ 17                                        | 18-20 | ≥ 21 | [1]       |
|                                        | Cefepime                      | 30                | ≤ 18                                        | 19-24 | ≥ 25 | [1]       |
|                                        | Cefoxitin                     | 30                | ≤ 14                                        | 15-17 | ≥ 18 | [1]       |
| Cephamycin                             | Ciprofloxacin                 | 5                 | ≤ 15                                        | 16-20 | ≥ 21 | [1]       |
| Fluoroquinolone                        | Nalidixic acid                | 30                | ≤ 13                                        | 14-18 | ≥ 19 | [1]       |
| Quinolone                              | Trimethoprim–sulfamethoxazole | 1.25/23.75        | ≤ 10                                        | 11-15 | ≥ 16 | [1]       |
| Folate pathway inhibitor               | Tigecycline                   | 15                | ≤ 14                                        | 15-17 | ≥ 18 | [2]       |
| Glycylcycline                          | Aztreonam                     | 30                | ≤ 17                                        | 18-20 | ≥ 21 | [1]       |
| Monobactam                             | Ampicillin                    | 10                | ≤ 13                                        | 14-16 | ≥ 17 | [1]       |
|                                        | Piperacillin                  | 100               | ≤ 17                                        | 18-20 | ≥ 21 | [1]       |
| Penicillin                             | Amoxicillin–clavulanic acid   | 20/10             | ≤ 13                                        | 14-17 | ≥ 18 | [1]       |
|                                        | Ampicillin–sulbactam          | 10/10             | ≤ 11                                        | 12-14 | ≥ 15 | [1]       |
| Penicillins plus β-lactamase inhibitor | Chloramphenicol               | 30                | ≤ 12                                        | 13-17 | ≥ 18 | [1]       |
| Phenicol                               | Tetracycline                  | 30                | ≤ 11                                        | 12-14 | ≥ 15 | [1]       |
| Tetracycline                           |                               |                   |                                             |       |      |           |

<sup>a</sup> The antimicrobial susceptibilities were indicated as resistant (R), intermediate resistant (I), or susceptible (S).

[1] CLSI (2017). Clinical and Laboratory Standards Institute. Performance Standards for Antimicrobial Susceptibility Testing. 27th ed. CLSI supplement M100. Wayne, PA: Clinical and Laboratory Standards Institute.

[2] EUCAST (2017). The European Committee on Antimicrobial Susceptibility Testing. Breakpoint tables for interpretation of MICs and zone diameters. Version 7.1.
